# Supplementary material
Source: PubMed Central journal article supplement (PMC4175417)

**Figure S2**

**(A)** Scatter plot of base model clearance-eta vs age. The solid black line depicts smooth (LOESS) trends, locally weighted and the dashed red line depicts null value. LOESS, locally weighted scatter plot smoothing.

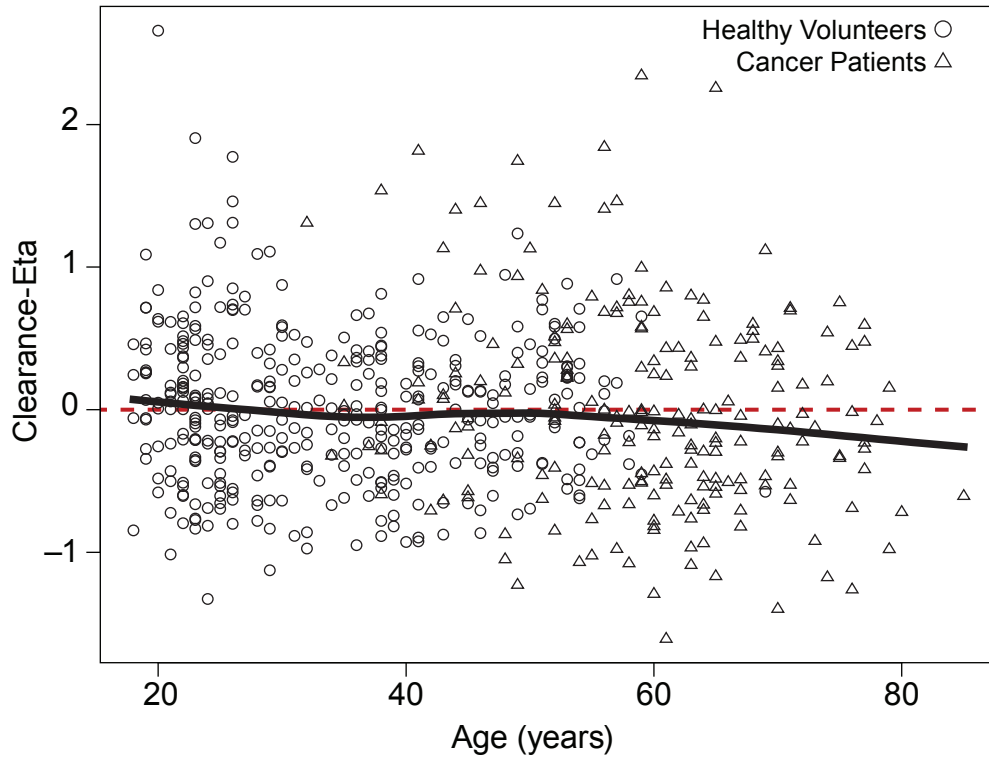

**(B)** Box-whisker plot showing base model clearance-eta vs age  $\leq$  or  $>60$  years. The dashed red line represents the null value. Median is represented by the white bar and outliers are represented by the horizontal black bars.

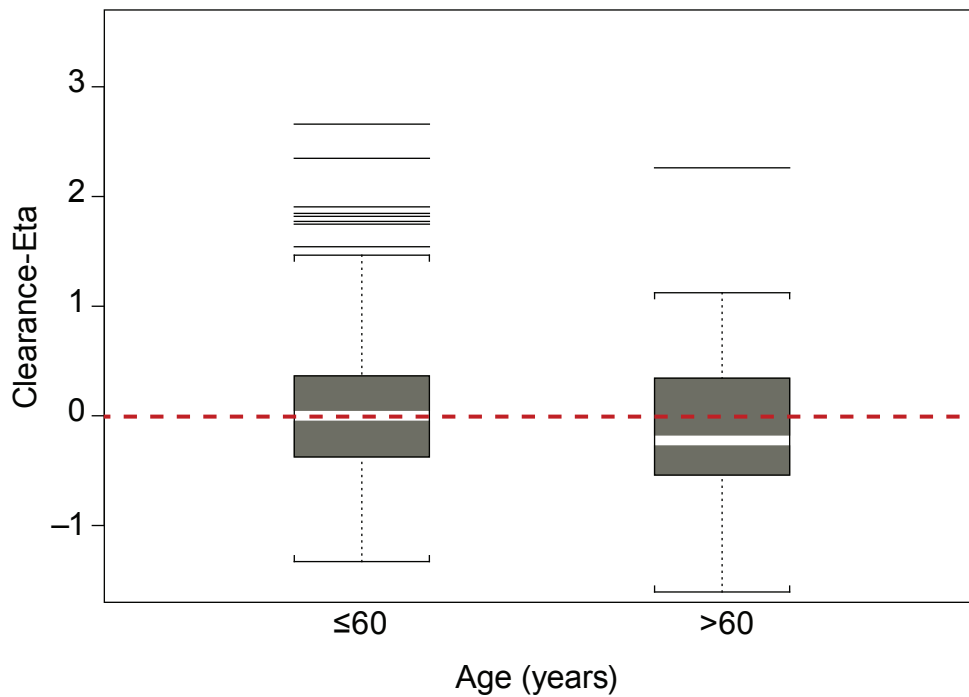

Supplement: NIHMS556651-supplement-Supplementary_Figure_S2.pdf [file NIHMS556651-supplement-Supplementary_Figure_S2.pdf]
