# Supplementary material
Source: PubMed Central journal article supplement (PMC4175417)

**Figure S3.** Box-whisker plot showing the clearance-eta vs study population relationship for the final model. The dashed red line represents the null value. Median is represented by the white bar and outliers are represented by the horizontal black bars.

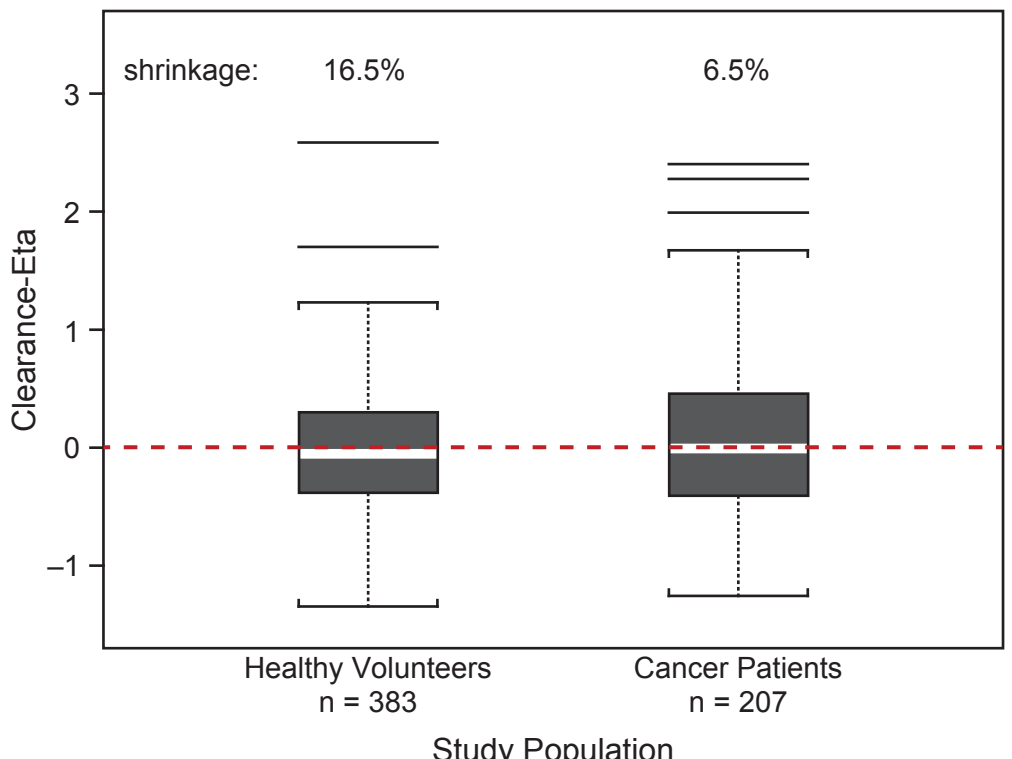

Supplement: NIHMS556651-supplement-Supplementary_Figure_S3.pdf [file NIHMS556651-supplement-Supplementary_Figure_S3.pdf]
