# Supplementary material
Source: PubMed Central journal article supplement (PMC4175417)

**Figure S4.** Axitinib exposures ( $AUC_{12}$ ) of a typical fed >60-year-old Japanese,  $\leq$ 60-year-old Japanese, >60-year-old non-Japanese, or  $\leq$ 60-year-old non-Japanese administered 5 mg axitinib Form XLI bid, with 95% prediction intervals (59.9% variability). The symbols represent median values.

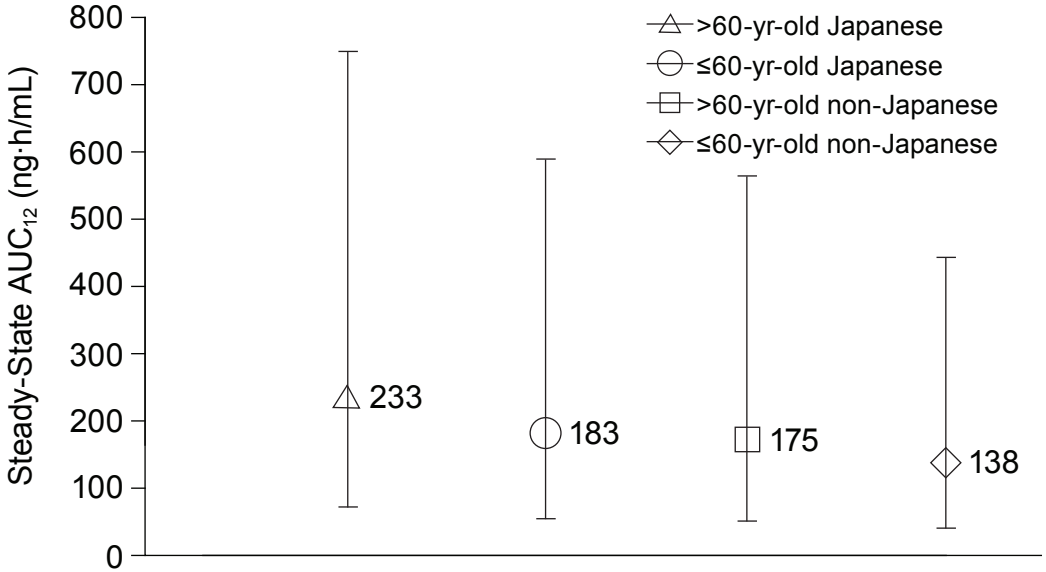

Supplement: NIHMS556651-supplement-Supplementary_Figure_S4.pdf [file NIHMS556651-supplement-Supplementary_Figure_S4.pdf]
