# Supplementary material
Source: PubMed Central journal article supplement (PMC4175417)

**Figure S5.** Simulated covariate effects for 1000 fed subjects (>60-year-old, 58-kg Japanese vs ≤60-year-old, 94-kg non-Japanese) at steady-state concentrations, with variability (5 mg bid, Form XLI). Concentration on log scale (A) and on linear scale (B).

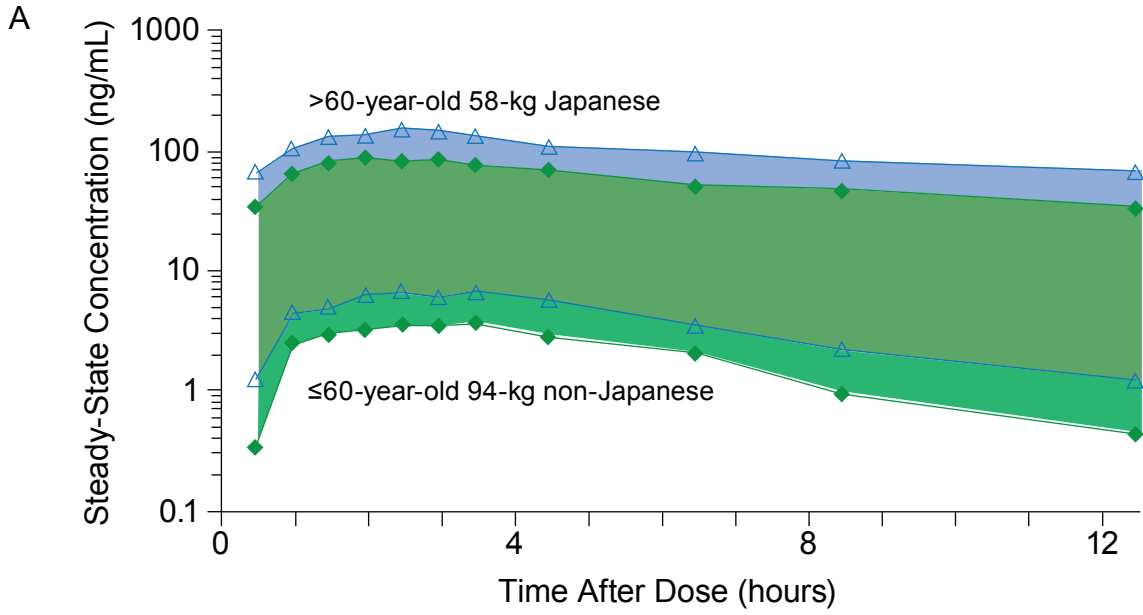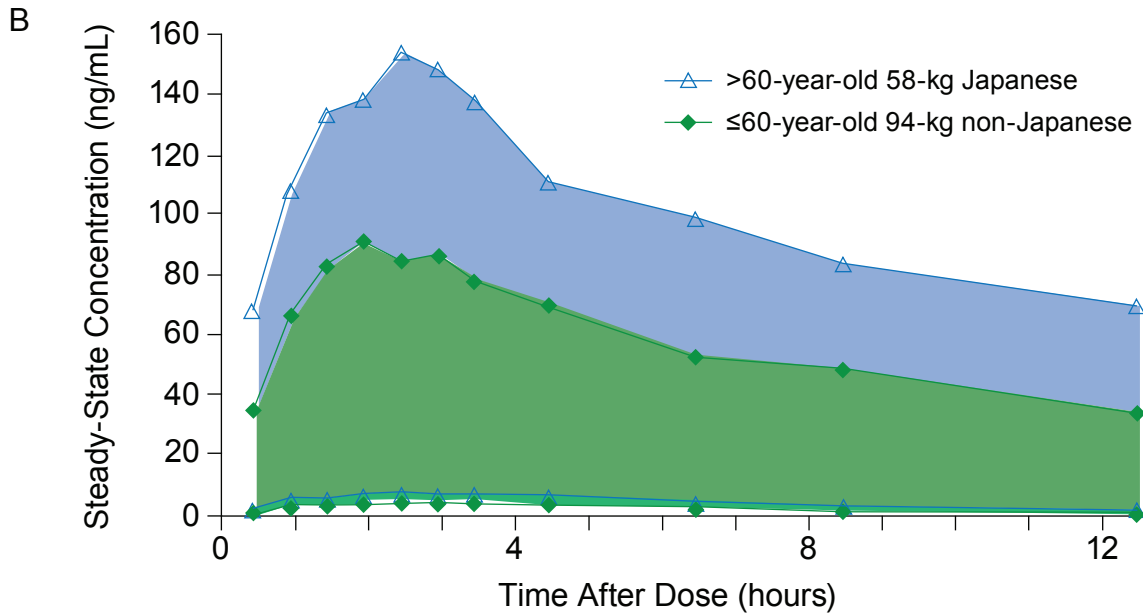

Supplement: NIHMS556651-supplement-Supplementary_Figure_S5.pdf [file NIHMS556651-supplement-Supplementary_Figure_S5.pdf]
